# Supplementary material for: Pharmacogenomic implications of the evolutionary history of infectious diseases in Africa
Source: PubMed Central journal article supplement — Pharmacogenomics J. 2016 Oct 25;17(2):112–20. doi: 10.1038/tpj.2016.78 (PMC5380847; doi:10.1038/tpj.2016.78), 2016-10-25
Supplement: tpj201678x1.pdf [file tpj201678x1.pdf]

**Supplemental Table 1.** Allele frequencies across African populations for alleles discussed in the text

| <b>rs333</b>      |                    |                                            |                  |
|-------------------|--------------------|--------------------------------------------|------------------|
| <b>Population</b> | <b>Sample Size</b> | <b>Frequency of <math>\Delta 32</math></b> | <b>Reference</b> |
| African Pygmies   | 51                 | 0                                          | ALFRED           |
| Baka              | 63                 | 0                                          | ALFRED           |
| Beninese          | 26                 | 0                                          | ALFRED           |
| Biaka             | 69                 | 0                                          | ALFRED           |
| Biaka             | 35                 | 0                                          | ALFRED           |
| Bidjuki           | 40                 | 0                                          | ALFRED           |
| Central African   | 52                 | 0                                          | ALFRED           |
| Chagga            | 45                 | 0                                          | ALFRED           |
| Egyptians         | 46                 | 0                                          | ALFRED           |
| ESN               | 99                 | 0                                          | 1000 Genomes     |
| Gambian           | 56                 | 0                                          | ALFRED           |
| Guinean           | 50                 | 0                                          | ALFRED           |
| Hausa             | 38                 | 0                                          | ALFRED           |
| Ibo               | 48                 | 0                                          | ALFRED           |
| Ivoirian          | 87                 | 0                                          | ALFRED           |
| Jews, Ethiopian   | 29                 | 0                                          | ALFRED           |
| Kako              | 21                 | 0                                          | ALFRED           |
| Kenyan            | 80                 | 0                                          | ALFRED           |
| Lisongo           | 11                 | 0                                          | ALFRED           |
| LWK               | 99                 | 0                                          | 1000 Genomes     |
| Maasai            | 11                 | 0                                          | ALFRED           |
| MAG               | 113                | 0                                          | 1000 Genomes     |
| Malawian          | 80                 | 0                                          | ALFRED           |
| Mbuti             | 39                 | 0                                          | ALFRED           |
| Mbuti             | 20                 | 0                                          | ALFRED           |
| MSL               | 85                 | 0                                          | 1000 Genomes     |
| Nigerians         | 23                 | 0                                          | ALFRED           |
| San, Central      | 36                 | 0                                          | ALFRED           |
| Sanaga            | 37                 | 0                                          | ALFRED           |
| Sao Tomeans       | 100                | 0                                          | ALFRED           |
| Sudanese          | 25                 | 0                                          | ALFRED           |
| Xhosa             | 64                 | 0                                          | ALFRED           |
| Yoruba            | 78                 | 0                                          | ALFRED           |
| YRI               | 108                | 0                                          | 1000 Genomes     |
| Zamane            | 49                 | 0                                          | ALFRED           |
| Zambian           | 96                 | 0                                          | ALFRED           |
| Zime              | 60                 | 0                                          | ALFRED           |
| Zulu              | 9                  | 0                                          | ALFRED           |
| Senegalese        | 139                | 0.001                                      | ALFRED           |
| Nigerians         | 111                | 0.005                                      | ALFRED           |
| Egyptians         | 154                | 0.006                                      | ALFRED           |
| Tunisian          | 145                | 0.010                                      | ALFRED           |
| Berber            | 42                 | 0.012                                      | ALFRED           |
| Moroccans         | 167                | 0.015                                      | ALFRED           |

|              |     |       |        |
|--------------|-----|-------|--------|
| Egyptians    | 72  | 0.021 | ALFRED |
| Tunisian     | 205 | 0.034 | ALFRED |
| Cape Verdean | 97  | 0.036 | ALFRED |
| Cape Verdean | 127 | 0.039 | ALFRED |
| Berber       | 39  | 0.051 | ALFRED |

**rs334**

| Population | Sample Size | Frequency of A | Reference    |
|------------|-------------|----------------|--------------|
| Amhara     | 24          | 0              | AGVP         |
| Gumuz      | 24          | 0              | AGVP         |
| Oromo      | 24          | 0              | AGVP         |
| Somali     | 24          | 0              | AGVP         |
| Wolayta    | 24          | 0              | AGVP         |
| Zulu       | 100         | 0.005          | AGVP         |
| Baganda    | 100         | 0.070          | AGVP         |
| LWK        | 99          | 0.101          | 1000 Genomes |
| MAG        | 113         | 0.115          | 1000 Genomes |
| ESN        | 99          | 0.121          | 1000 Genomes |
| MSL        | 85          | 0.124          | 1000 Genomes |
| YRI        | 108         | 0.139          | 1000 Genomes |

**rs1495741**

| Population     | Sample Size | Frequency of A | Reference    |
|----------------|-------------|----------------|--------------|
| Biaka          | 31          | 0.190          | ALFRED       |
| San            | 6           | 0.250          | ALFRED       |
| Zulu           | 100         | 0.495          | AGVP         |
| Mbuti          | 15          | 0.500          | ALFRED       |
| Yoruba         | 24          | 0.500          | ALFRED       |
| Igbo           | 99          | 0.505          | AGVP         |
| YRI            | 108         | 0.514          | 1000 Genomes |
| Jola           | 79          | 0.525          | AGVP         |
| Sotho          | 86          | 0.535          | AGVP         |
| Bantu-Speakers | 12          | 0.540          | ALFRED       |
| MSL            | 85          | 0.541          | 1000 Genomes |
| Bantu-Speakers | 8           | 0.560          | ALFRED       |
| Mandenka       | 24          | 0.560          | ALFRED       |
| ESN            | 99          | 0.561          | 1000 Genomes |
| MAG            | 113         | 0.566          | 1000 Genomes |
| Ga-Adangbe     | 100         | 0.590          | AGVP         |
| Wolof          | 78          | 0.596          | AGVP         |
| Baganda        | 100         | 0.600          | AGVP         |
| Mandinka       | 88          | 0.619          | AGVP         |
| Fula           | 74          | 0.622          | AGVP         |
| Gumuz          | 24          | 0.646          | AGVP         |

|             |     |       |              |
|-------------|-----|-------|--------------|
| Banyarwanda | 100 | 0.655 | AGVP         |
| LWK         | 99  | 0.662 | 1000 Genomes |
| Barundi     | 97  | 0.670 | AGVP         |
| Kalenjin    | 100 | 0.730 | AGVP         |
| Kikuyu      | 99  | 0.737 | AGVP         |
| Mozabite    | 30  | 0.780 | ALFRED       |
| Amhara      | 42  | 0.821 | AGVP         |
| Oromo       | 26  | 0.827 | AGVP         |
| Somali      | 39  | 0.859 | AGVP         |
| Wolayta     | 24  | 0.938 | AGVP         |

**rs1799929**

| Population  | Sample Size | Frequency of T | Reference    |
|-------------|-------------|----------------|--------------|
| San         | 40          | 0.140          | ALFRED       |
| Yoruba      | 20          | 0.140          | ALFRED       |
| YRI         | 108         | 0.171          | 1000 Genomes |
| Igbo        | 99          | 0.182          | AGVP         |
| ESN         | 99          | 0.187          | 1000 Genomes |
| MSL         | 85          | 0.188          | 1000 Genomes |
| Ga-Adangbe  | 100         | 0.200          | AGVP         |
| Jola        | 79          | 0.215          | AGVP         |
| Zulu        | 100         | 0.220          | AGVP         |
| Hausa       | 20          | 0.250          | ALFRED       |
| Mandinka    | 87          | 0.259          | AGVP         |
| Sotho       | 86          | 0.262          | AGVP         |
| Wolof       | 78          | 0.269          | AGVP         |
| Fula        | 74          | 0.270          | AGVP         |
| Luo         | 16          | 0.270          | ALFRED       |
| Barundi     | 97          | 0.278          | AGVP         |
| MAG         | 113         | 0.283          | 1000 Genomes |
| Baganda     | 100         | 0.305          | AGVP         |
| Gumuz       | 24          | 0.313          | AGVP         |
| LWK         | 99          | 0.328          | 1000 Genomes |
| Ibo         | 19          | 0.340          | ALFRED       |
| Kalenjin    | 100         | 0.345          | AGVP         |
| Banyarwanda | 100         | 0.350          | AGVP         |
| Kikuyu      | 99          | 0.424          | AGVP         |
| Somali      | 39          | 0.436          | AGVP         |
| Maasai      | 12          | 0.460          | ALFRED       |
| Amhara      | 42          | 0.500          | AGVP         |
| Oromo       | 26          | 0.558          | AGVP         |
| Wolayta     | 24          | 0.604          | AGVP         |

**rs2814778**

| <b>Population</b> | <b>Sample Size</b> | <b>Frequency of C</b> | <b>Reference</b> |
|-------------------|--------------------|-----------------------|------------------|
| Berber            | 25                 | 0.040                 | ALFRED           |
| Moroccans         | 48                 | 0.106                 | ALFRED           |
| Tunisian          | 44                 | 0.148                 | ALFRED           |
| Tunisian          | 58                 | 0.155                 | ALFRED           |
| Libya             | 31                 | 0.161                 | ALFRED           |
| Libya             | 31                 | 0.161                 | ALFRED           |
| Tunisian          | 44                 | 0.171                 | ALFRED           |
| Libya             | 67                 | 0.202                 | ALFRED           |
| Tunisian          | 94                 | 0.207                 | ALFRED           |
| Algerian          | 35                 | 0.214                 | ALFRED           |
| Tunisian          | 42                 | 0.214                 | ALFRED           |
| Berber            | 30                 | 0.217                 | ALFRED           |
| Tunisian          | 44                 | 0.227                 | ALFRED           |
| Mozabite          | 26                 | 0.231                 | ALFRED           |
| Moroccans         | 41                 | 0.256                 | ALFRED           |
| Tunisian          | 45                 | 0.256                 | ALFRED           |
| Tunisian          | 12                 | 0.500                 | ALFRED           |
| Amhara            | 24                 | 0.521                 | AGVP             |
| Oromo             | 24                 | 0.583                 | AGVP             |
| Wolayta           | 24                 | 0.604                 | AGVP             |
| Somali            | 8                  | 0.625                 | ALFRED           |
| Jews, Ethiopian   | 34                 | 0.779                 | ALFRED           |
| Zulu              | 100                | 0.800                 | AGVP             |
| Bantu-Speakers    | 8                  | 0.880                 | ALFRED           |
| Maasai            | 143                | 0.930                 | ALFRED           |
| Mbuti             | 37                 | 0.973                 | ALFRED           |
| Maasai            | 19                 | 0.974                 | ALFRED           |
| Sandawe           | 39                 | 0.974                 | ALFRED           |
| Somali            | 24                 | 0.979                 | AGVP             |
| Chagga            | 44                 | 0.989                 | ALFRED           |
| Biaka             | 69                 | 0.993                 | ALFRED           |
| Baganda           | 100                | 1                     | AGVP             |
| Bantu-Speakers    | 12                 | 1                     | ALFRED           |
| Biaka             | 35                 | 1                     | ALFRED           |
| ESN               | 99                 | 1                     | 1000 Genomes     |
| Gumuz             | 24                 | 1                     | AGVP             |
| Hausa             | 38                 | 1                     | ALFRED           |
| Ibo               | 47                 | 1                     | ALFRED           |
| Lisongo           | 7                  | 1                     | ALFRED           |
| LWK               | 99                 | 1                     | 1000 Genomes     |
| MAG               | 113                | 1                     | 1000 Genomes     |
| Malinke           | 113                | 1                     | ALFRED           |
| Mandenka          | 24                 | 1                     | ALFRED           |
| MSL               | 85                 | 1                     | 1000 Genomes     |
| San               | 7                  | 1                     | ALFRED           |
| Yoruba            | 76                 | 1                     | ALFRED           |
| Zaramo            | 39                 | 1                     | ALFRED           |
| YRI               | 108                | 0.995                 | 1000 Genomes     |

**rs4149032**

| <b>Population</b> | <b>Sample Size</b> | <b>Frequency of C</b> | <b>Reference</b> |
|-------------------|--------------------|-----------------------|------------------|
| ESN               | 99                 | 0.187                 | 1000 Genomes     |
| Sotho             | 86                 | 0.198                 | AGVP             |
| Mandinka          | 88                 | 0.205                 | AGVP             |
| Gumuz             | 24                 | 0.208                 | AGVP             |
| MAG               | 113                | 0.226                 | 1000 Genomes     |
| Igbo              | 98                 | 0.235                 | AGVP             |
| Baganda           | 100                | 0.255                 | AGVP             |
| MSL               | 85                 | 0.265                 | 1000 Genomes     |
| LWK               | 99                 | 0.278                 | 1000 Genomes     |
| YRI               | 108                | 0.282                 | 1000 Genomes     |
| Jola              | 79                 | 0.285                 | AGVP             |
| Kalenjin          | 100                | 0.330                 | AGVP             |
| Barundi           | 97                 | 0.351                 | AGVP             |
| Kikuyu            | 99                 | 0.364                 | AGVP             |
| Banyarwanda       | 99                 | 0.389                 | AGVP             |
| Somali            | 39                 | 0.423                 | AGVP             |
| Wolayta           | 24                 | 0.438                 | AGVP             |
| Amhara            | 42                 | 0.488                 | AGVP             |
| Oromo             | 26                 | 0.596                 | AGVP             |

**Key:** ESN- Esan in Nigeria; LWK- Luhya in Webuye, Kenya; MAG- Gambian in Western Division, Mandinka; MSL- Mende in Sierra Leone; YRI- Yoruba in Ibadan, Nigeria

**References****1000 Genomes**

Auton A, Brooks LD, Durbin RM, Garrison EP, Kang HM, Korbel JO, et al. A global reference for human genetic variation. *Nature* 2015; 526(7571): 68-74.

**AGVP**

Gurdasani D, Carstensen T, Tekola-Ayele F, Pagani L, Tachmazidou I, Hatzikotoulas K, et al. The African Genome Variation Project shapes medical genetics in Africa. *Nature* 2015; 517(7534): 327-332.

**ALFRED**

Cheung KH, Osier MV, Kidd JR, Pakstis AJ, Miller PL, Kidd KK. ALFRED: an allele frequency database for diverse populations and DNA polymorphisms. *Nucleic Acids Res* 2000; 28(1):361-3.
